# Supplementary material for: Orthogonal click reactions enable the synthesis of ECM-mimetic PEG hydrogels without multi-arm precursors
Source: Royal Society of Chemistry journal article supplement (doi:10.1039/c8tb01399c), 2018-01-01
Supplement: c8tb01399c1.pdf [file c8tb01399c1.pdf]

Supporting information for:

---

**Orthogonal click reactions enable the synthesis of ECM-mimetic PEG  
hydrogels without multi-arm precursors**

Faraz Jivan, Natalia Fabela, Zachary Davis and Daniel L. Alge\*

Department of Biomedical Engineering, Texas A&M University

---

**Figure S1.** Crude HPLC Chromatogram for Peptide Sequences

**Figure S2.** MALDI Spectra for Peptide Sequences

**Figure S3.** *In Situ* Rheology Showing Gelation Point

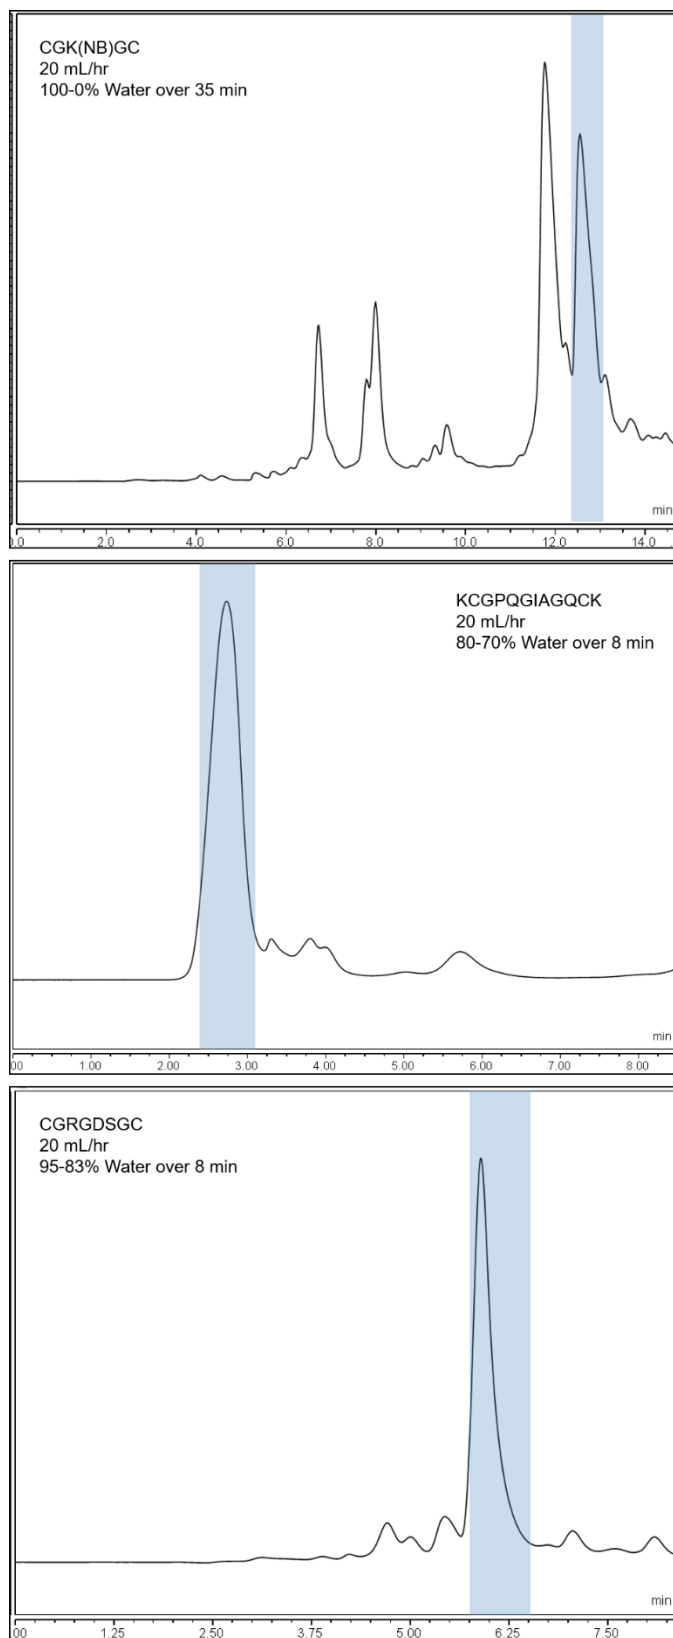

**Fig. S1** Crude HPLC Spectra for Peptide Sequences. HPLC spectra of synthesized peptides used to make BCP precursors. The instrument method (acetonitrile and water mobile phase) and collected fraction are shown for each sequence.

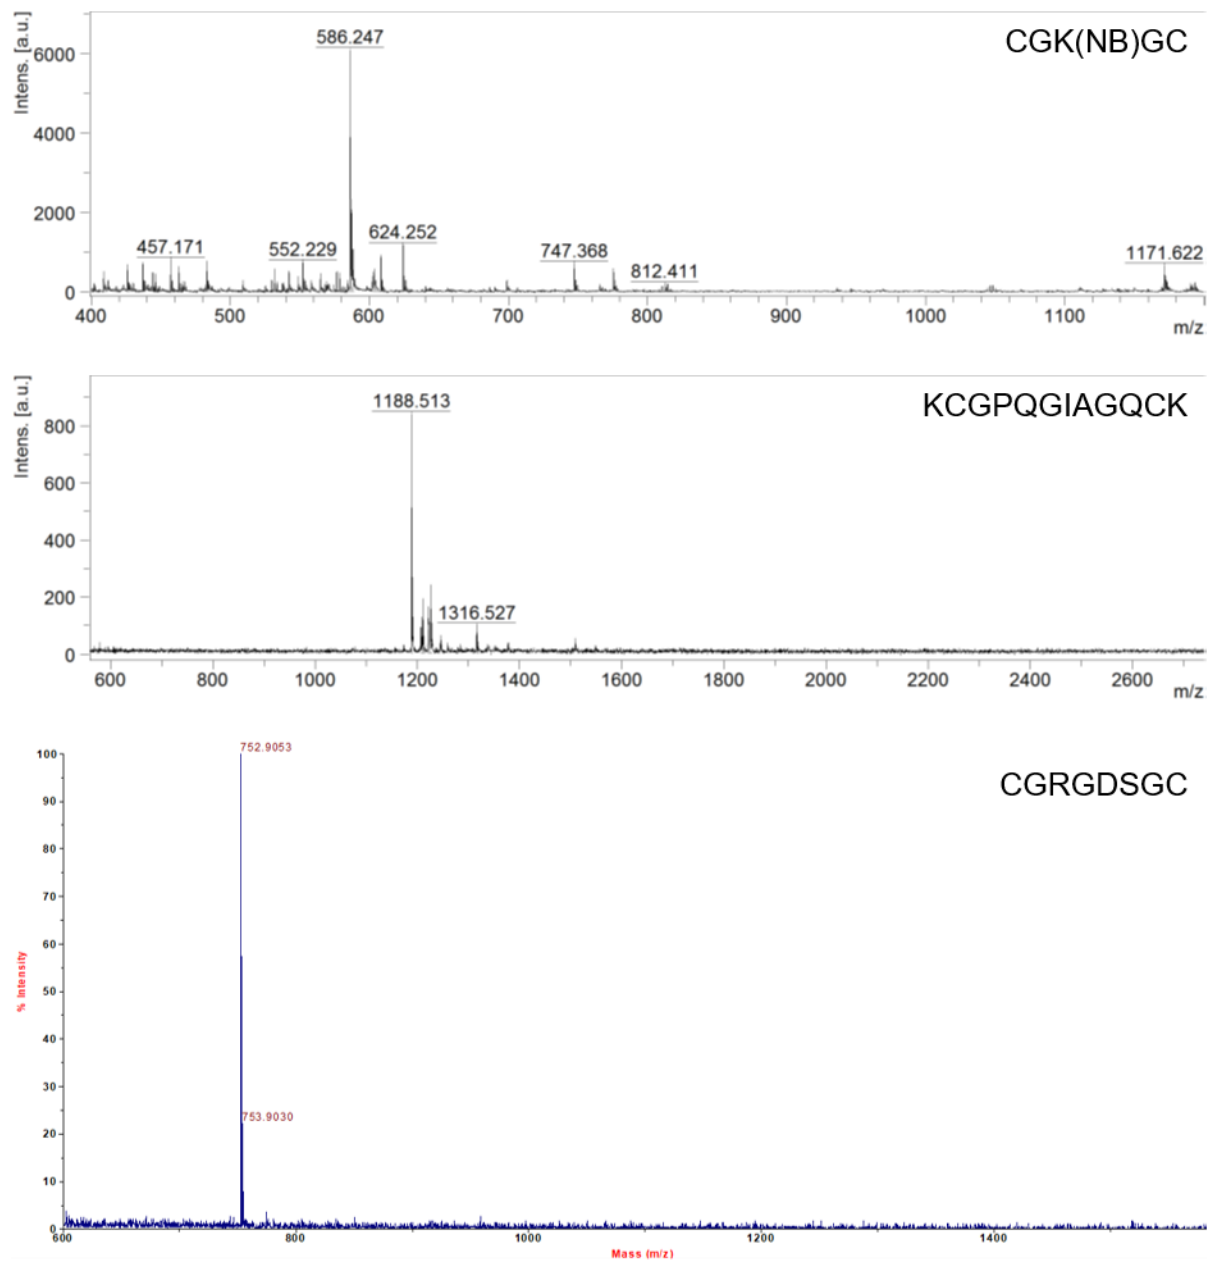

**Fig. S2** MALDI Spectra for Peptide Sequences. MALDI spectra for the selected HPLC fraction collected for each of the synthesized peptide sequences.

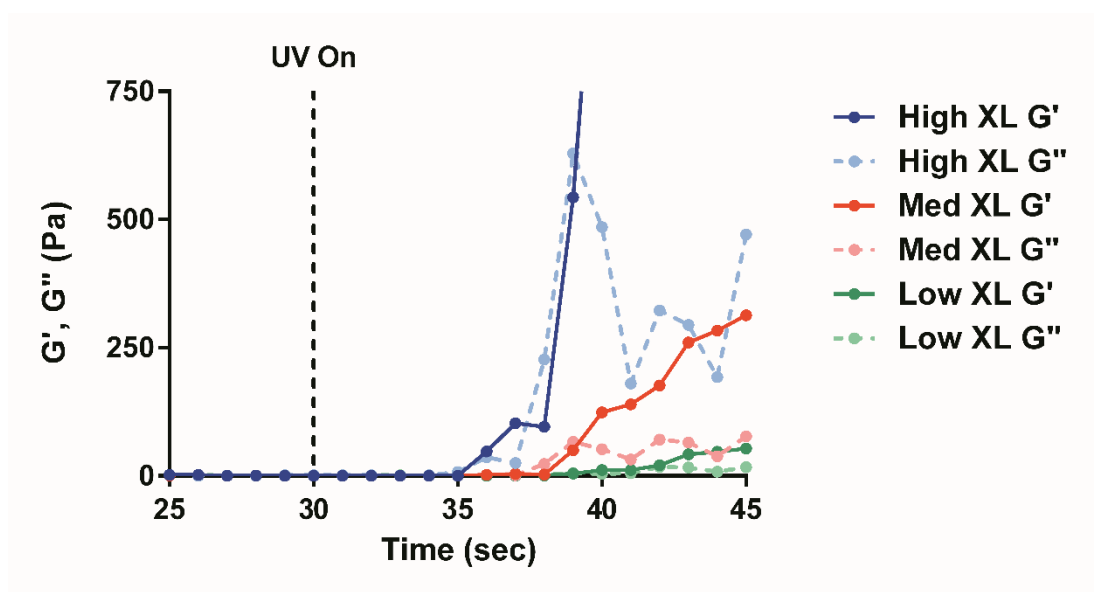

**Fig. S3** *In Situ* Rheology Showing Gelation Point. Zoomed in area of representative storage ( $G'$ ) and loss ( $G''$ ) modulus curves from *in situ* rheology of various BCP crosslinking densities. The dashed line shows when UV initiation begins and the gel point is when  $G'$  is maintained higher than  $G''$  (after approximately 10 seconds).
